---

# Beta and theta oscillations correlate with subjective time during musical improvisation in ecological and controlled settings: a single subject study

Nicolas Farrugia<sup>1,\*</sup>, Alix Lamouroux<sup>1</sup>, Christophe Rocher<sup>2</sup>, Giulia Lioi<sup>1</sup>

**1** IMT Atlantique

**2** Ensemble Nautilus

\* [nicolas.farrugia@imt-atlantique.fr](mailto:nicolas.farrugia@imt-atlantique.fr)

## Abstract

In this paper, we describe the results of a single subject study attempting at a better understanding of the subjective state during musical improvisation. In a first experiment, we setup an ecological paradigm measuring EEG on a musician in free improvised concerts with an audience, followed by retrospective rating of the mental state of the improviser. We introduce Subjective Temporal Resolution (STR), a retrospective rating assessing the instantaneous attention of the musician towards short or long musical events. We identified high and low STR states using Hidden Markov Models in two performances, and were able to decode those states using supervised learning on instantaneous EEG power spectrum, showing increases in theta and alpha power with high STR values. In a second experiment, we found an increase of theta and beta power when experimentally manipulating STR in a musical improvisation imagery experiment. These results are interpreted with respect to previous research on flow state in creativity, as well as with the temporal processing literature. We suggest that a component of the subjective state of musical improvisation may be reflected in an underlying mechanism responsible for modulating subjective temporal processing of musical events.

## 1 Introduction

”Improvisation enjoys the curious distinction of being both the most widely practiced of all musical activities, and the least understood and acknowledged.” [4]. Fourty years have passed since Derek Bailey wrote these words [4], and musical improvisation has now been widely acknowledged as a model to investigate the neuroscience of creativity [6, 25]. A wealth of studies done the last 15 years have attempted to elucidate the neural correlates of musical improvisation, mostly through hypothesis-driven research, and broadly asking questions of two types: (1) what makes brain activity during improvisation different than other music-related activity, and (2) is there long term plasticity associated with the (expert) practice of improvisation [6]. Much of these hypothesis seem driven by initial

accounts proposed by the theoretical framework from Pressing [38,39], which considers improvisation as a complex activity requiring significant domain-specific expertise related to musical training such as sensorimotor synchronisation, motor planning, procedural memory for accurate sensorimotor execution, as well as a combination of a range of cognitive functions such as long term memory and generative processes involved in creativity [38]. A wealth of neuroscientific studies have confirmed the role of many brain networks such as the executive control network, notably involved in regulating attention and working memory, as well as the default mode network which mediates mental simulation (e.g. mental time travel) and mind wandering [6]. Studies have shown that while the activity in these two networks were traditionally considered as anti-correlated [41], they can operate concurrently during musical improvisation [37]. More recently, authors have proposed that motor and premotor regions are also involved in musical improvisation, possibly managing temporal aspects of performance [5]. Taken together, these studies have brought light on brain areas that are important for musical improvisation, either because they are activated during performance, or because of long term plasticity effects associated with expertise.

Most of the aforementioned studies have used functional MRI in order to shed light on the spatial location of brain networks involved in improvisation. Many other studies have used electroencephalography (EEG) and magnetoencephalography, in order to get a finer temporal understanding of neuronal activity during improvisation. Studies have found improvisation related activity in the alpha (8–12 Hz) and beta (13–30 Hz) frequency range [7, 16, 45] located in prefrontal and medial frontal areas, while other studies have examined brain connectivity [32, 49] or power changes at the sensor level [14, 42, 43].

Another perspective developed in the literature consists in considering musical improvisation as a *subjective state* [6, 15, 26, 47]. This perspective revisits the involvement of brain networks of spontaneous, endogenous activity such as the default mode network [37], and considers the notion of flow state as central in the phenomenology of musical improvisation [47]. Nevertheless, with the exception of [15] that considered EEG measurements on performers and audience in a live concert, researchers have mostly relied on controlled lab experiment that compared improvisation with "non-improvisation" conditions [6]. To address this bias, it has been argued that the study of the neuroscience of creativity, and in particular musical improvisation, would be better approached by setting up collaborations between scientists and artists in order to achieve both ecological and scientific validity [29]. In this paper, we attempt at such an endeavor by collaborating with a professional musician in the free improvisation scene.

The rest of this paper is organized as follows. In section 2, we describe our general setting, the collaboration with the artist, and the definition of an ecological paradigm to study musical improvisation. We performed EEG measurements on a musician during live concerts, followed by retrospective ratings of the performance. This paradigm has led us to consider a new hypothesis to test with regards to subjective time during musical improvisation. We present in section 3 a controlled paradigm design to test this hypothesis. Finally, we discuss our results and our approach in section 4.

---

## 2 Experiment 1 : ecological paradigm 58

### 2.1 Materials and methods 59

#### 2.1.1 Subject description 60

This study was performed on a single subject, also co-author of this manuscript, Christophe Rocher (CR), 53 years old. CR started playing the clarinets at the age of 7, and plays both the clarinet and the bass clarinet. CR has performed regularly in regional, national and international music scenes, in particular in the free improvisation scene, with ensembles of various sizes, as well as in performances with other artists such as dancers or spoken word artists. Importantly, the present study involves CR more than as a mere participation as a musician; we setup a collaboration with CR in order to define an appropriate approach to study musical improvisation from the point of view of an improviser. This collaboration was kept all along the project, but its goal was to assist on the definition of the main paradigm. 61  
62  
63  
64  
65  
66  
67  
68  
69  
70  
71

#### 2.1.2 Preliminary phase 72

We aimed at defining an ecological paradigm to study improvisation, with two aims. First, we tried to approach improvisation from the point of view of CR. The point made here consists in examining in detail the strategies developed by one particular improviser during his career, and document closely his creative process. Second, we target the study of subjective mental states associated with his performance. The proposed approach attempts at studying improvisation using a bottom-up approach, starting from the subjective experience of the improviser and in an ecological manner. 73  
74  
75  
76  
77  
78  
79  
80

Experimental sessions consisted in free improvised concerts with an audience, followed by a relistening session. The goal of the relistening session is for CR to attempt a retrospective mental replay of his subjective experience during the performance. We aimed at documenting this retrospective phase. In preliminary experiments taking the form of private rehearsals, CR made an open commentary while listening to the performance. A first informal discussion around the content of these commentaries has enabled us to consider several emerging concepts : focus on improvisation, flow, satisfaction about the music being played, and the relationship between the musicians and subjective time perception. According to CR, these concepts are the ones that forge his everyday practice, and are related to the musical and personal objective occurring during a performance with an audience. At this stage in the project, we identified and acknowledged two important limitations in our approach. First, we are aware of the idiosyncrasies of these concepts, which may or may not apply to other professional improvisers. Second, as the open commentary of CR of his improvised performances tended to lean towards the same concepts, we decided to attempt a quantification of these concepts, by performing a continuous rating with three factors while listening to the performance. 81  
82  
83  
84  
85  
86  
87  
88  
89  
90  
91  
92  
93  
94  
95  
96  
97  
98

**a. ECOLOGICAL PARADIGM**

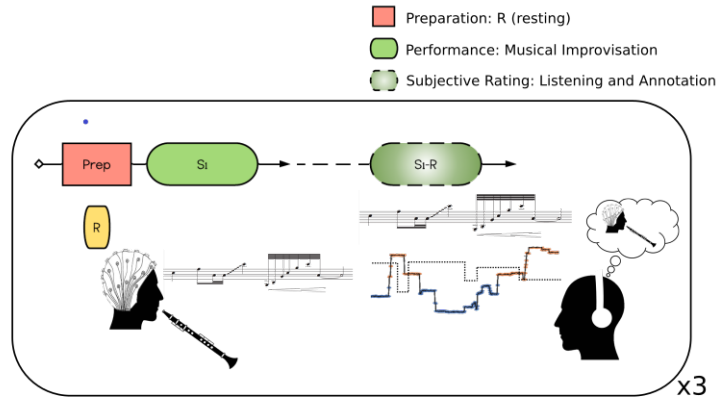

**b. CONTROLLED PARADIGM**

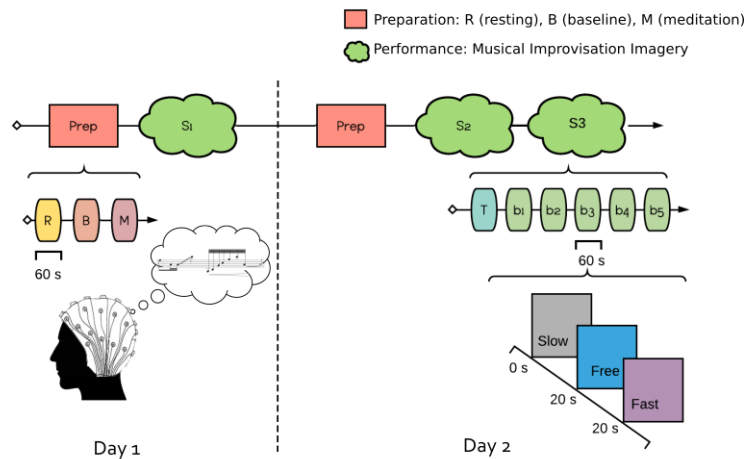

**Figure 1: Experimental Protocols Schematics.** a. Ecological Paradigm. The experiment included two parts. In the first, EEG was recorded while the subject performed musical improvisation. In the second part, the subject listened to its own performance and performed the retrospective rating using the two factors Focus and STR, detailed in section 2.1.2. b. Controlled Paradigm. The experiment was carried out in two days. In the first, the subject underwent a Preparation session where he performed 60 s of Resting (Eyes Opened), 60 s of Baseline and 60 s of Meditation. He then performed a musical improvisation imagery task with a Slow, Fast or Free conditions. The second part (two days later) was as the first, with the exception that two training sessions were performed.

Six rehearsals were performed in total, which are considered as the pilot phase of the project. During the first rehearsal, the retrospective phase consisted in the open commentary described above. During the second and third rehearsal, we asked CR to annotate the performance using a continuous rating with three factors. We agreed with CR on the meaning of the extreme values of these factors, and debriefed after each annotation session to make sure that the annotation were performed consistently.

The first factor was "focus", and corresponds to how much CR felt he was successfully focused on improvising. A high value in Focus meant that CR was improvising while not being distracted. A low value meant that the focus on improvisation was compromised for various reasons. These reasons can relate to sonic or technical aspects of playing such as being in tune, having a nice clarinet sound, breathing. CR also reported higher level cognitive distractions related to the audience or music unrelated mind-wandering, in which case he also put a low value for focus. The second factor was "Subjective Temporal Resolution" (STR), corresponding to how much CR felt he was paying attention to longer or shorter musical events. Note that STR does not necessarily correspond to the speed of notes that CR is currently playing himself, if he is playing at all. CR reported that he consistently set low (respectively high) values of STR when he was paying attention to long (respectively short) events. The third factor was "quality", related to the personal satisfaction about the music being played. This factor judged *a posteriori* the quality of the music, from the point of view of CR, in terms of whether it corresponds to what he expects to offer to the audience.

These three factors were used for annotating the second and third rehearsal. The performances were annotated just after being played. A debriefing at the end of the third rehearsal was done and we agreed with CR that the third factor, "quality", was most of the time highly correlated with "focus", and it was also challenging to annotate three factors simultaneously and continuously while listening. We therefore decide to drop the "quality" factor. The three other rehearsals were used for piloting the EEG recording, getting familiar with playing with the EEG device while minimizing head or eye movements. We also performed these last rehearsals with a very limited audience (1 to 2 people) in order to get closer to a public performance setting.

## 2.2 Procedure

### 2.2.1 Ecological paradigm

Here, we describe the final ecological setting that was used for the three public performances considered in this paper. Two performances took place in March 2019 in Brest, France, in front of audiences of 50 people (referred to as perf1 and perf2 in the rest of this paper). The third performance (perf3) took place in Montreal at the Montreal Neurological Institute in June 2019. Each performance was scheduled to last 20 minutes maximum, and the aim was to break it into two sessions of 10 minutes. The performances were followed by a 20 minute

long talk and a discussion, presenting the project aims, and involving CR in 142  
the discussion with the audience. A video of performance 3 can be found 143  
here <https://www.youtube.com/watch?v=ILhaZYtW8fs>. 144

## 2.2.2 Data acquisition 145

Each session was structured in the following way (Figure 1 panel a). CR played 146  
pieces in duet or trio lasting approximately 10 minutes. During each piece, we 147  
recorded audio and electroencephalography (EEG) on CR. EEG was acquired 148  
using an open BCI 8 channel Cyton amplifier. We used the headband kit to 149  
measure three frontal flat snap electrodes positioned on Fpz, Fp2 and Fp1, 150  
as well as two temporal dry comb electrodes located at FT7 and FT8. EEG 151  
was recorded at a sample rate of 250 Hz using the Fieldtrip buffer [35] and 152  
the EEG synth software (<https://github.com/eegsynth/eegsynth>). A one 153  
minute resting state was acquired, during which CR relaxed and prepared himself 154  
silently. This one minute resting state was part of the public performance and 155  
served as a silent introduction. Following each piece, CR listened back to 156  
the audio recording (no later than 24 hours following the performance), and 157  
performed the retrospective rating using the two factors Focus and STR, detailed 158  
in section 2.1.2. Retrospective rating was acquired using the Bitwig software 159  
using a USB-MIDI control interface with two continuous sliders. 160

## 2.3 Data analysis 161

### 2.3.1 Behavioral data analysis 162

A qualitative analysis of the values taken by Focus, suggested that the Focus 163  
rating was generally high during performance (figure 2, right panel). Discussions 164  
with CR have led us to consider that Focus did not represent a source of variability 165  
inherent to musical improvisation, but rather was indicative of whether he reached 166  
the target state enabling him to improvise. As a consequence, in the rest of 167  
our analysis, we will only consider the STR rating. We used Hidden Markov 168  
Models (HMM) [40] to quantify the STR time series into discrete states. HMM 169  
is a probabilistic sequence model that estimates a series of hidden states from 170  
a set of observations. These hidden states are interpretable as causal factors 171  
of the probabilistic model (e.g. subjective "states" of STR). We considered a 172  
HMM with Gaussian emissions with two hidden states corresponding to *low* 173  
and *high* values of STR. We used the hmmlearn package (<https://hmmlearn.readthedocs.io/en/latest/index.html>) to learn the HMM model solving the 174  
iterative Baum-Welch Expectation-Maximization algorithm [12]. 175  
176

### 2.3.2 EEG preprocessing 177

EEG data were preprocessed using the MNE-python toolbox [20]. First, Signals 178  
were bandpassed filtered with a FIR (Finite Impulse Response) filter in the 179  
1 - 40 Hz frequency band. To reduce eye movement artefacts, we perform 180  
Independent Component Analysis (ICA) using the *fastica* algorithm [21] applied 181

to continuous data. We ran an autodetection algorithm to find the independent component that best matched the ‘EOG’ channel (prefrontal electrode Fp2). ICA components that strongly correlate with the EOG signal were then removed (adaptive Z-score threshold = 1.6) and the EEG signal was reconstructed with the remaining components.

### 2.3.3 Time-frequency analysis and decoding model

We performed a time-frequency analysis using multitaper filters to estimate the EEG power spectral density and the average power in different frequency bands (theta, alpha and beta) computed with reference to the individual alpha frequency [3] of the subject (IAF= 9.3 Hz). Based on IAF frequency we estimated the theta, alpha and beta bands respectively equal to [4.5-7.5] Hz, [7.5-11.5] Hz, [11.5-25] Hz. We estimated the EEG power for 3 seconds epochs and assessed whether it could predict the STR as being low or high using a decoding model with a Support Vector Classifier (SVC) and a radial basis function kernel with regularization ( $C = 1$ , penalty on the squared  $l_2$  norm), implemented in the scikit-learn package [36]. In order to test for within-sample generalization of our decoding model using the data at hand, we used a stratified K-fold cross-validation with 4 folds in order to consider the same percentage of samples of each class per fold. We measured classification accuracy and f1-score for each class and fold. In order to provide an even more conservative robustness assessment of our results, we performed a hundred repetitions of the same cross-validated SVC training using random permutations of class labels (see [https://scikit-learn.org/stable/modules/generated/sklearn.model\\_selection.permutation\\_test\\_score.html](https://scikit-learn.org/stable/modules/generated/sklearn.model_selection.permutation_test_score.html)). This permutation test score provides an estimation of the chance level of our decoding model according to the variance in the dataset. We performed a post-hoc univariate statistical inference analysis by investigating changes in the different frequency bands related to the STR state. More specifically, we assessed differences between average EEG power during low and high states in the theta, alpha and beta bands by means of a pair-wise two-sided Welch t-test using the SciPy Stats library (<https://docs.scipy.org/doc/scipy/reference/stats.html#module-scipy.stats>).

## 2.4 Results

### 2.4.1 Behavioral results

Results of the HMM analysis of STR time-series for performances 1 and 3 are reported in Figure 2. Two hidden states corresponding to low and high STR values were identified: the relative estimated Gaussian distributions are represented in the left panels of Figure 2 while their values during the performance, together with the Focus index trends are reported in the right panels. EEG recordings of perf1 were highly contaminated by environmental and movement artifacts (see EEG results section). Since we only examined behavioral indexes



relative to preprocessed EEG epochs, the number of samples of STR and Focus 223  
for perf1 is drastically reduced as compared to perf3, resulting in a sparser 224  
histogram distribution and shorter time-series. 225  
We note that Focus values are generally staying high during performance, with 226  
a few disrupted moments occurring with low values. As a consequence, we did 227  
not model the variability in Focus, and the rest of the analysis was performed 228  
with respect to HMM states obtained by the analysis of STR values. 229

**a. Performance 1**

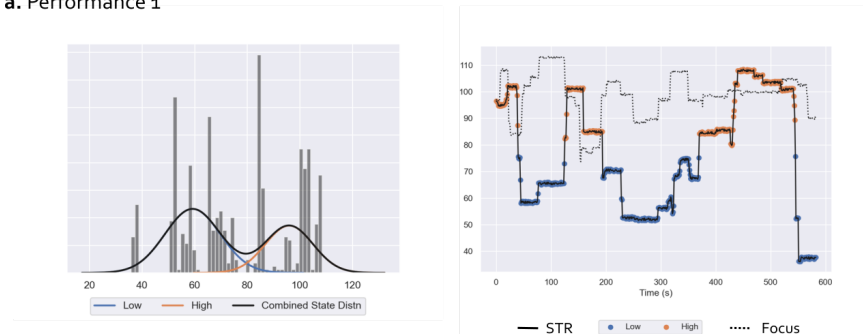

**b. Performance 3**

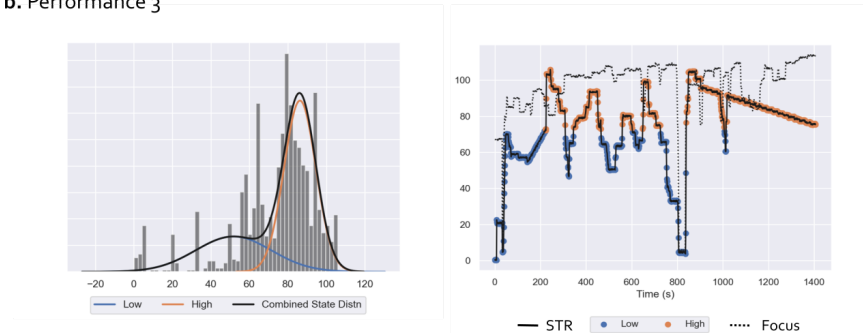

**Figure 2: Ecological Paradigm: Results of HMM analysis of subjective rating scores for performance 1 (panel a.) and performance 3 (panel b.)** Left: STR samples histograms and distribution (black) as a mixture of low (blue) and high (orange) states Gaussian distributions. Right: STR (solid line) and Focus (dotted line) time-series relative to the performances 1 and 3. For the STR, samples corresponding to the low and high states are labeled with blue and orange markers respectively.

**2.4.2 EEG results**

A hardware problem with the EEG amplifier occurred when recording perf2, so 230  
we only report results on perf1 and perf3. The EEG recordings of perf1 being 231  
very noisy, only the equivalent of 10 minute recordings survived artifact rejection 232  
and were considered for further analysis. 233  
234



For perf1, SVC results indicated that high and low STR states could be classified with an average accuracy of  $0.69 \pm 0.11$  (standard deviation across folds) (f1-score high  $0.63 \pm 0.16$  - 94 examples-, f1-score low  $0.74 \pm 0.10$  - 87 examples-). Similarly for perf3, a SVC trained on EEG power distinguished low from high states with an average accuracy of  $0.69 \pm 0.11$  (f1-score high  $0.69 \pm 0.16$  -165 examples-, f1-score low  $0.66 \pm 0.12$  -170 examples-). The permutation test in both cases indicated that the decoding model performed significantly better than chance ( $p < 0.01$ )

Post-hoc statistical analysis (Figure 3) for the different frequency bands revealed that theta, and beta average power was higher in the high STR state condition as compared to the low condition both in perf1 (theta:  $p=2.5e-08$ ,  $t(155)=-6.30$ ; beta:  $p=6.4e-07$ ,  $t(139)=-5.69$ ) and perf3 (theta:  $p=3.1e-06$ ,  $t(239)=-5.24$ ; beta:  $p=1.9e-05$ ,  $t(226)=-4.8$ ). This trend was also observed in the Alpha band for perf1 ( $p=1.8e-07$ ,  $t(154)=-5.91$ ) but was not significant in perf3 ( $p=7.8e-01$ ,  $t(201)=-1.7$ ).

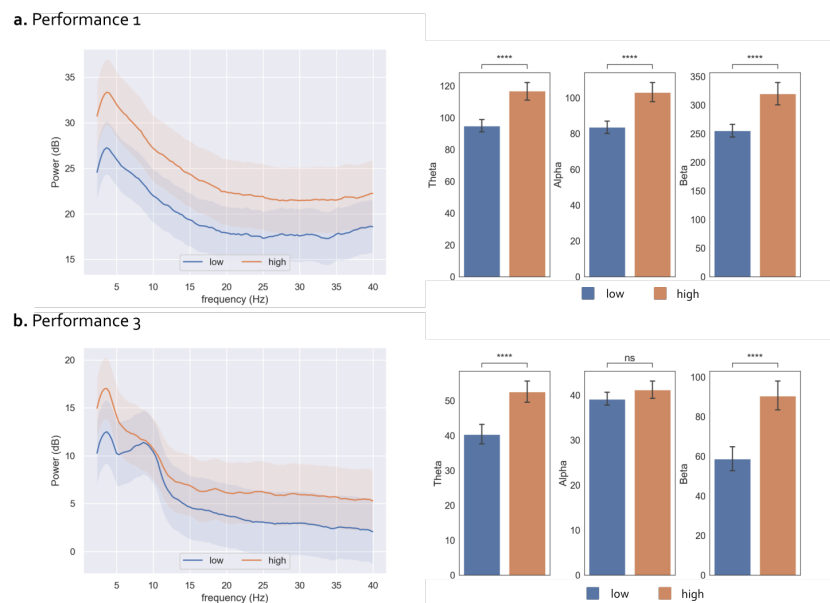

**Figure 3: Ecological Paradigm: Results of EEG post-hoc frequency analysis in relation to STR for performance 1 (panel a.) and performance 3 (panel b.)** Results represent EEG power averaged across electrodes. Left: EEG Power Spectral Density (mean across 3 s epochs) corresponding to low (blue) and high (orange) states, with 95% confidence intervals. Right: Bar plots representing the EEG power (mean  $\pm$  std) in the Theta, Alpha and Beta bands in low and high states. Square brackets indicate significant differences as assessed with pair-wise two-sided Welch t-test (\*\*\*\*  $p < 0.00001$ )

---

## 3 Experiment 2 : controlled paradigm 250

### 3.1 Materials and Methods 251

#### 3.1.1 Procedure 252

The experimental paradigm is described in Figure 1 panel b. The main goal of this experiment is to manipulate STR in a controlled setting, by asking CR to perform a musical improvisation imagery task, while constraining himself to stay in a particular state with respect to STR. Three conditions were considered : Slow, Fast and Free. Slow and Fast corresponded respectively to a state in which STR stays with either Low or High values. These states are considered according to the retrospective rating phase of Experiment 1 (see sections 2.1.2 and 2.4.1). The instructions given to CR were to imagine he was improvising while keeping a subjective state that he would have rated as either Low or High during the retrospective phase. The third condition, Free, corresponded to musical improvisation imagery without constraints on a subjective state related to STR. The experiment was carried out over two separate sessions on two different days. During each session, we performed a preparation phase which consisted in a one-minute long resting state with eyes open (R), a one-minute active baseline consisting in counting backwards (B), and a one-minute meditation phase (M) during which CR attempted to focus on breathing. These conditions were implemented in order to have clear cut comparisons between states with different mental workload in order to check signal quality, and were not analyzed further (except for the B condition which was used to determine IAF). Following the preparation phase was the musical improvisation imagery task. The experiment was organized into a training block, followed by 5 blocks. The order of conditions was randomized and counterbalanced across blocks, and each condition was presented fifteen times in total. Each block consisted in three consecutive trials of twenty seconds. Instructions were given vocally at the beginning of each trial, with the experimenter pronouncing the words "Slow", "Fast", or "Free". These instructions were explained before the training block. A debriefing after the practice block of each session was made, in order to gather informal feedback on the feasibility of the task. Within a block, a condition might be repeated, in order to avoid that CR predicts the third condition and change his strategy accordingly. A short break was done after each block. During the first session, we performed only five blocks, while two times five blocks were done during the second session, with a longer break between after the fifth block.

#### 3.1.2 EEG acquisition 285

The measurements were done in two slightly different settings for day 1 and day 2. During day 1, we performed the experiment in a moderately quiet environment, a common space with a few people passing. During day 2, we performed experiments in a quiet room with only the experimenter and CR. CR performed all the conditions while closing his eyes, and could open his eyes between blocks. CR was sitting in front of a white wall with the experimenter in

his back. EEG was acquired using the same amplifier and software setup than  
in Experiment 1 (see section 2.2.2), but with a different electrode montage. Four  
goldcup electrodes were positioned at O4, P4, C4 and Fp4 using conductive  
paste.

## 3.2 Data analysis

### 3.2.1 EEG preprocessing

As for the first experiment, we performed ICA on the band-pass filtered EEG sig-  
nals (1.0-40.0Hz) in order to reduce eye movements artifacts using the prefrontal  
electrode Fp2 as a proxy for the EOG channel. We then divided each block  
into 20 seconds segments according to the trial onsets, and removed the first 5  
seconds of each trial to reduce the effect of transition between trials. Finally,  
trials were segmented into consecutive epochs of 3 seconds, and epochs in which  
the signal amplitude of one or more channels was high were removed, using a  
threshold set to keep 90% of data.

### 3.2.2 Statistical analysis

Individual Alpha Frequency (IAF) [3] was determined by finding the individual  
dominant EEG frequency in the baseline signal. As for the first experiment the  
resulting frequency bands were: theta [4.5-7.5] Hz, alpha [7.5-11.5] and beta  
[11.5-25] Hz. To conduct our analysis, we estimated the average power spectral  
density across the four electrodes (Fp2,C4, P4, O2) using multitaper filters, and  
we computed the power in the different frequency bands. The 3 second-long  
epochs were labelled with the corresponding condition (free, slow, and fast) and  
Welch pair-wise t-tests were performed to assess the effect of condition on the  
EEG power magnitude in different frequency bands of interest. Results were  
corrected for multiple comparison according to the Bonferroni correction.

## 3.3 Results

### 3.3.1 Behavioral results

CR indicated that he could generally perform the task, and gave details about  
specific mental imagery strategies that he used to help him perform the task  
correctly. CR indicated that he imagined himself playing in specific places, with  
specific people. As a consequence, the feedback given by CR suggest that he  
engaged more than a in constrained mental imagery exercise.

### 3.3.2 EEG results

Statistical analysis results (Figure 4) revealed that beta power was higher in  
the Slow condition as compared to the Fast condition ( $p=0.049$ ,  $t(116)= 2.83$ ).  
The Free condition was associated with a higher beta ( $p=0.011$ , $t(119)=3.31$ ) )  
and theta power ( $p=0.008$ ,  $t(134)=-3.41$ ) if compared with the Fast condition.

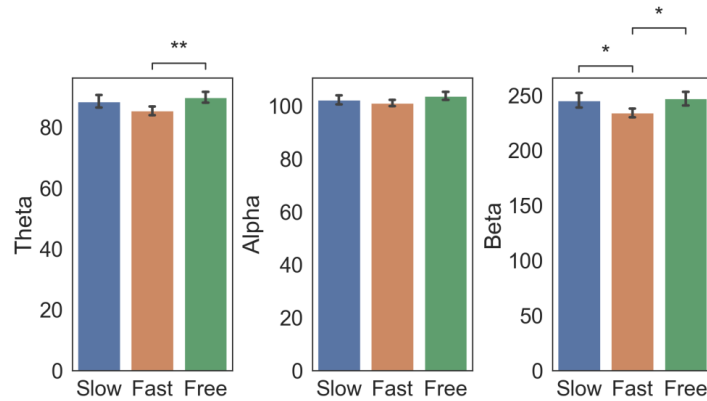

Figure 4: **Controlled paradigm: EEG power changes as a function of subjective time condition.** EEG power (mean  $\pm$  std across electrodes Fp2, C4, P4 and O2) in the Theta, Alpha and Beta bands in epochs corresponding to Slow, Fast and Free condition. Square brackets indicate significant differences as assessed with pair-wise Welch t-test (\*  $p < 0.05$ , \*\*  $p < 0.01$ , Bonferroni corrected)

This trend was also observed in the Alpha band but did not survive Bonferroni correction.

## 4 Discussion

### 4.1 Summary

We have presented an ecological paradigm of musical improvisation live performance with an audience, consisting in EEG measurements of an improviser, followed by a listening phase with retrospective rating. The objective of the rating was to perform *a posteriori* mental replay of the subjective state of the performer. A discussion with the improviser led us to consider two continuous factors when rating performance: Focus and Subjective Temporal Resolution (STR). The meaning of these factors was discussed, piloted and consistently confirmed with the subject. Focus measured a general tendency to "feel in the music", or "being in the zone". STR measured subjective temporal resolution of the attention to musical events, which indicates whether the improviser was paying attention to shorter or longer musical events at a specific moment. Using a decoding model trained on EEG power during performance, we found that states of high and low STR could be reliably distinguished, and were related to increases in average theta and beta power during the high STR state. In a second experiment in a controlled setting, we designed a musical improvisation imagery experiment targeted at testing differences in brain oscillations with

respect to STR. 349

## 4.2 Musical improvisation as a target subjective state ? 350

We approached the question of characterizing improvisation as a target subjective state, measured by two factors in a retrospective rating. The concept of musical improvisation as a subjective state was previously proposed [15,26], and was interpreted in the context of flow state [10]. In the following, we attempt to interpret the two factors we measured, Focus and STR. 351 352 353 354 355

Focus corresponds to a component of a common definition of flow state, “the holistic sensation that people feel when they act with total involvement,” [10], and has been extensively studied, including in the music improvisation literature (e.g. see [8,15,27,47]). Previous research on flow state during improvisation was mostly done using interviews and observations [47]. In our case, a qualitative analysis of the values taken by the Focus rating, together with informal observations discussed with the performer, suggested that Focus was generally staying high during musical improvisation performance, and corresponded to a target for appropriate performance. Preliminary exploratory correlation analysis between EEG power and the Focus factor did not reveal any link in our measurements. 356 357 358 359 360 361 362 363 364 365

On the contrary, STR has not been previously documented as an aspect of flow state. Previous studies have proposed that the distortion of subjective time perception is an important part of the psychological state of flow [10,11]. Such an account usually refers to the feeling of an accelerated passing of time during flow state, and has been measured previously in laboratory conditions [22], as well as in previous studies such as in gaming [34] and music performance [8]. To our knowledge, STR has not been a measure of interest in previous studies on flow state of musical improvisation. We therefore have to turn to the temporal processing and the attention literature to bring some light on our findings. 366 367 368 369 370 371 372 373 374

## 4.3 Subjective temporal resolution and temporal processing 375 376

Temporal resolution has been measured experimentally with simultaneity judgment tasks [46], in particular audiovisual simultaneity. Recent reviews have shown considerable variation in task performance according to stimulus modality, inter-individual differences, age, as well as subjective states [1], [53]. Interestingly, musical training has been shown to influence audiovisual simultaneity judgments [23], suggesting that long-term training modulate musician’s ability to integrate audiovisual information concurrently. Recently, audiovisual simultaneity has been linked to phase resetting in the EEG beta band [24]. However, we cannot comment on whether such integration processes are related to our findings on STR, as simultaneity judgments can only be done in lab settings with controlled stimuli. The attempt at measuring STR had the objective of tapping into subjective processes related to the perception of auditory (musical) events, and we did not consider other modalities such as vision or touch, nor did we discuss the embodied aspect of this subjective process [52]. 377 378 379 380 381 382 383 384 385 386 387 388 389 390

---

#### 4.4 Brain oscillations and subjective temporal resolution 391

The proposed STR measure as well as our EEG results may also be interpreted 392  
with regards to a large body of work on electrophysiological correlates of temporal 393  
processing [28, 50], in light of predictive processes (such as isochronous sounds or 394  
beat perception), duration estimation and attention to temporal events [33]. We 395  
note first that no single EEG frequency band has been dominantly associated 396  
with temporal processing, as comprehensively shown in the cross-study review 397  
by [50]. More specific effects have been suggested in different types of paradigm. 398  
First, it has been shown that temporal expectations may modulate power in 399  
the theta band, as well as the coupling between theta phase and beta power [9], 400  
which could indicate the existence of a central mechanism for controlling neural 401  
excitability according to temporal expectations. These results have been recently 402  
complemented by a study that combined electrical stimulation and reanalysis of 403  
previous EEG data, showing an intrinsic role of beta oscillations in the memory 404  
of temporal duration [51]. The beta band has also been associated with effects 405  
of temporal prediction in the case of beat-based timing in perception [19] and 406  
imagery [18]. Finally, a classical paradigm to study temporal attention consists 407  
in providing a cue that predicts (or not) a short or long foreperiod between a 408  
warning stimulus and an imperative stimulus requiring a motor response. This 409  
paradigm revealed shorter reaction times when the cue successfully predicts the 410  
length of the foreperiod, together with an increases amplitude of the Contingent 411  
Negative Variation [30], as well as an increased EEG power between 6 and 8 412  
Hz for stimuli with short foreperiods compared to long ones [2]. These results 413  
suggests that the brain allocates a temporal attention window of variable length 414  
mediated by underlying oscillatory mechanisms, namely the magnitude of EEG 415  
power in the 6 to 8 Hz band (upper theta band). 416

In experiment 1, we found a higher power in low frequency oscillations (4.5 417  
to 7.5 Hz, dubbed theta in our study) and beta band (11.5 to 25 Hz) with 418  
high STR compared to low STR. This suggests that STR as measured in this 419  
ecological paradigm might reflect an underlying endogenous timing mechanism 420  
that calibrates the duration of a temporal window integrating musical events, 421  
or equivalently, the rate of a sampling mechanism involved in the perception 422  
of musical events. This interpretation would fit with the description of the 423  
behavioral relevance of STR as discussed with CR during the definition of 424  
the protocol. It is obviously difficult to compare the ecological paradigm of 425  
experiment 1 with controlled experiments such as the ones mentioned previously, 426  
as we do not have controlled stimuli and multiple repetitions. The choice of 427  
performing a first experiment in an ecological setting was essential to define 428  
behavioral indexes related to the subjective experience of the musician, but 429  
came with some drawbacks. The main one is the limited quality of EEG signals 430  
collected in an environment exposed to noise and while CR was performing (e.g. 431  
freely moving). This compromised EEG recording during perf 2 and affected 432  
perf 1 signal quality. These limitations also motivated us to perform a second 433  
study in a controlled setting, where we could experimentally manipulate the 434  
subjective time state and assess STR changes on good-quality EEG recordings. 435

As a consequence, we attempted to test specifically the effect of varying the rate of this sampling mechanism by defined a controlled paradigm. In experiment 2, we instructed the subject to perform musical improvisation imagery while keeping a specific state of STR. In a third condition, no constraint was given and the subject could perform imagery without keeping a constant STR state. We found an elevated theta and beta power when comparing the Free (unconstrained) condition with the Fast condition (corresponding to a high STR state), as well as higher beta power for Slow compared to Fast. While it can seem surprising to find a reverse effect than in experiment 1, it is difficult to conclude as theta and beta power was overall higher in the Free condition, which is the one that is closer to the ecological paradigm. Nevertheless, our results suggest that oscillatory power in the theta and beta band is correlated with an internal, subjective temporal processing system related to STR.

#### 4.5 Brain oscillations and flow state in musical improvisation

A qualitative analysis of our ecological paradigm led us to consider the first rating, Focus, as a indicator of flow state during improvisation. We did not find any statistical association between the values of Focus and EEG power spectrum. However, in experiment 2, we did find a higher power in the theta and beta band when comparing the Free condition with the Fast condition. In this experiment, the Free condition corresponded to an unconstrained, more natural situation with respect to experiment 1, in contrast with the Slow and Fast conditions that instructed CR to perform mental imagery of a specific STR state. Therefore, the power increase observed in the Free condition may be interpreted in light of previous findings that showed EEG activity increases when comparing improvisation with "non-improvisation" [7,43]. Note however that the observed power increase might also be interpreted in a more general framework of creativity and flow state. Several studies have suggested a correlation between alpha-band activity and creative tasks [45]. Generally, it has been observed that tasks requiring greater creativity resulted in higher alpha power [17]. In particular, musical improvisation studies have reported higher alpha power in central and posterior regions of the brain, and a deactivation in prefrontal regions during the experience of flow [13]. Overall, the majority of the studies investigating creativity and musical improvisation report changes in alpha power, some studies even report clearer changes specifically in upper alpha [7,43]. In experiment 2, the power increase between Free and Fast was found in the upper frequency band [11.5-25] Hz, as we defined alpha as [7.5-11.5] Hz in which only a trend towards statistical significance could be observed. As a consequence we can situate our results among previous studies, while keeping it clear that we only considered one expert subject. This effect requires replication with a larger and more diverse sample, and could be the goal of future controlled studies attempting at examining musical improvisation or creativity using mental imagery.



---

## 4.6 Implications for the artistic endeavour

479

The proposed collaboration between arts and sciences represents an original contribution towards artists in terms of imagination, a resource for them to explore new ideas. Personal introspection in the form of retrospective ratings has the potential to give artists a special insight into creation and musical practice. Open questions arise with respect to understanding the link between subjective states and musical outcomes, and such an understanding could potentially enhance the creative process. Furthermore, the discovery of experimental research and neuroscientific methods could bring artists with several new insights. Such collaborations could help make the artists aware that the scientific view of artistic creation contribute to a better understanding of creativity [29]. Such an endeavor may challenge the place of the musician as part of a complex, dynamical system including the other musicians and the audience. This questioning is in line with recent accounts on understanding musical creativity using the embodiment framework and dynamical systems [48]. Another contribution for artists is to learn about new technologies available today, with the idea of possibly directing musical and technological research towards the fabrication of new tools for musical computing, using for example neurofeedback or the sonification of brain waves. The wealth of research on brain computer interfaces, neurofeedback [44], and music information retrieval [31], could potentially contribute to the future of musical creation.

480  
481  
482  
483  
484  
485  
486  
487  
488  
489  
490  
491  
492  
493  
494  
495  
496  
497  
498  
499

## 4.7 Limitations and perspectives

500

The limitations in this study are mostly inherent to the choices made regarding the ecological setting and the collaboration with a musician. As we considered a single subject, we do not have clear indications on the ability to generalize the concepts developed here and the findings to other musicians or other creative process. Future studies could attempt at testing hypothesis related to STR or flow in ecological settings using larger groups of musicians. In addition, while we decided early on to focus on a single subject, we relied only on retrospective reports and EEG recordings. The use of retrospective reports is limited by the metacognitive abilities of the rater, namely his ability to perform mental replay of the improvised performance. Such an ability might not be present with all musicians, which is another limitation towards a generalization of this procedure. Alternatively, future studies could consider semi-structured interviews in addition to retrospective ratings, which could potentially alleviate the bias introduced by ratings, while giving a richer qualitative view on the creative process, as done in previous musical improvisation studies [47]. Finally, as we measured brain activity on a single subject using EEG during musical performance, the measured signal is largely contaminated with movement artifacts and other sources of noise inherent to the ecological context. Future studies might consider using functional near infrared spectroscopy (fNIRS) and motion capture simultaneously with EEG in order to provide a complementary view on brain activity while accounting for movement.

501  
502  
503  
504  
505  
506  
507  
508  
509  
510  
511  
512  
513  
514  
515  
516  
517  
518  
519  
520  
521

---

## 4.8 Conclusion

522

In this study, we have setup a collaboration with an artist, CR, performing free musical improvisation. This collaboration has led us to define an ecological paradigm to study musical improvisation during live performances with audiences, using retrospective ratings and electroencephalography. We have suggested a measure of Subjective Temporal Resolution as a correlate of a subjective state related to temporal attention to musical events during performance, and were able to relate this measure to EEG oscillatory power in the theta / low alpha and beta band. We subsequently devised a controlled musical improvisation imagery experiment and found a relationship between constraints on subjective time and oscillatory power in the EEG. Our results bring an original perspective on the study of musical improvisation and creativity, by showing the potential of single subject studies and ecological paradigms.

523  
524  
525  
526  
527  
528  
529  
530  
531  
532  
533  
534

## Conflict of Interest Statement

535

The authors declare that the research was conducted in the absence of any commercial or financial relationships that could be construed as a potential conflict of interest.

536  
537  
538

## Author Contributions

539

NF and CR designed the study and ran the experiments. AL, GL and NF analyzed the data. All co-authors contributed to writing the manuscript.

540  
541

## Funding

542

Giulia Lioi is funded by the Brittany region, grant "SAD - MultiGSP" and by the Finistere department, grant "MultiGSP".

543  
544

## Acknowledgments

545

This is a short text to acknowledge the contributions of specific colleagues, institutions, or agencies that aided the efforts of the authors.

546  
547

## Data Availability Statement

548

The code and data for this study can be found at the following url <https://github.com/alixlam/Brainsongs1>.

549  
550

---

## References

1. V. Arstila and D. Lloyd. *Subjective time: The philosophy, psychology, and neuroscience of temporality*. MIT Press Cambridge, MA, USA:, 2014.
2. C. Babiloni, C. Miniussi, F. Babiloni, F. Carducci, F. Cincotti, C. Del Percio, G. Sirello, C. Fracassi, A. C. Nobre, and P. M. Rossini. Sub-second “temporal attention” modulates alpha rhythms. a high-resolution eeg study. *Cognitive Brain Research*, 19(3):259–268, 2004.
3. C. Babiloni, F. Pistoia, M. Sarà, F. Vecchio, P. Buffo, M. Conson, P. Onorati, G. Albertini, and P. M. Rossini. Resting state eyes-closed cortical rhythms in patients with locked-in-syndrome: An eeg study. *Clinical Neurophysiology*, 121(11):1816–1824, 2010.
4. D. Bailey. *Musical improvisation: its nature and practice in music*. Prentice Hall, 1982.
5. D. Bashwiner and D. Bacon. Musical creativity and the motor system. *Current Opinion in Behavioral Sciences*, 27:146–153, 2019.
6. R. E. Beaty. The neuroscience of musical improvisation. *Neuroscience & Biobehavioral Reviews*, 51:108–117, 2015.
7. J. Boasen, Y. Takeshita, S. Kuriki, and K. Yokosawa. Spectral-spatial differentiation of brain activity during mental imagery of improvisational music performance using meg. *Frontiers in human neuroscience*, 12:156, 2018.
8. A. Chirico, S. Serino, P. Cipresso, A. Gaggioli, and G. Riva. When music “flows”. state and trait in musical performance, composition and listening: a systematic review. *Frontiers in psychology*, 6:906, 2015.
9. A. M. Cravo, G. Rohenkohl, V. Wyart, and A. C. Nobre. Endogenous modulation of low frequency oscillations by temporal expectations. *Journal of neurophysiology*, 106(6):2964–2972, 2011.
10. M. Csikszentmihalyi. Beyond boredom and anxiety: Experiencing flow in work and play. *San Francisco/Washington/London*, 1975.
11. M. Csikszentmihalyi and M. Csikszentmihalyi. *Flow: The psychology of optimal experience*, volume 1990. Harper & Row New York, 1990.
12. A. Dempster, N. Laird, and D. Rubin. Maximum Likelihood Estimation From Incomplete Data Via Em-Type Algorithms. *Journal of the Royal Statistical Society*, 39(1):1–38, 1997.
13. A. Dietrich and R. Kanso. A review of eeg, erp, and neuroimaging studies of creativity and insight. *Psychological bulletin*, 136(5):822, 2010.

14. L. A. Dikaya and I. A. Skirtach. Neurophysiological correlates of musical creativity: the example of improvisation. *Psychology in Russia: State of the art*, 8(3):84–97, 2015.
15. D. Dolan, H. J. Jensen, P. A. Mediano, M. Molina-Solana, H. Rajpal, F. Rosas, and J. A. Sloboda. The improvisational state of mind: a multidisciplinary study of an improvisatory approach to classical music repertoire performance. *Frontiers in psychology*, 9:1341, 2018.
16. D. Dolan, J. Sloboda, H. J. Jensen, B. Crüts, and E. Feygelson. The improvisatory approach to classical music performance: An empirical investigation into its characteristics and impact. *Music Performance Research*, 6(2013):1–38, 2013.
17. A. Fink and M. Benedek. Eeg alpha power and creative ideation. *Neuroscience & Biobehavioral Reviews*, 44:111–123, 2014.
18. T. Fujioka, B. Ross, and L. J. Trainor. Beta-band oscillations represent auditory beat and its metrical hierarchy in perception and imagery. *Journal of Neuroscience*, 35(45):15187–15198, 2015.
19. T. Fujioka, L. J. Trainor, E. W. Large, and B. Ross. Internalized timing of isochronous sounds is represented in neuromagnetic beta oscillations. *Journal of Neuroscience*, 32(5):1791–1802, 2012.
20. A. Gramfort, M. Luessi, E. Larson, D. Engemann, D. Strohmeier, C. Brodbeck, R. Goj, M. Jas, T. Brooks, L. Parkkonen, and M. Hämäläinen. Meg and eeg data analysis with mne-python. *Frontiers in Neuroscience*, 7:267, 2013.
21. A. Hyvarinen. Fast and robust fixed-point algorithms for independent component analysis. *IEEE Transactions on Neural Networks*, 10(3):626–634, 1999.
22. S.-h. Im and S. Varma. Distorted time perception during flow as revealed by an attention-demanding cognitive task. *Creativity Research Journal*, 30(3):295–304, 2018.
23. C. Jicol, M. J. Proulx, F. E. Pollick, and K. Petrini. Long-term music training modulates the recalibration of audiovisual simultaneity. *Experimental brain research*, 236(7):1869–1880, 2018.
24. J. Kambe, Y. Kakimoto, and O. Araki. Phase reset affects auditory-visual simultaneity judgment. *Cognitive neurodynamics*, 9(5):487–493, 2015.
25. A. T. Landau and C. J. Limb. The neuroscience of improvisation. *Music Educators Journal*, 103(3):27–33, 2017.
26. J. A. Lopata, E. A. Nowicki, and M. F. Joannis. Creativity as a distinct trainable mental state: an eeg study of musical improvisation. *Neuropsychologia*, 99:246–258, 2017.

27. C. D. B. Luft, I. Zioga, N. M. Thompson, M. J. Banissy, and J. Bhat-tacharya. Right temporal alpha oscillations as a neural mechanism for inhibiting obvious associations. *Proceedings of the National Academy of Sciences*, 115(52):E12144–E12152, 2018.
28. F. Macar and F. Vidal. Event-related potentials as indices of time processing: a review. *Journal of Psychophysiology*, 18(2/3):89–104, 2004.
29. M. McPherson and C. J. Limb. Difficulties in the neuroscience of creativity: Jazz improvisation and the scientific method. *Annals of the New York Academy of Sciences*, 1303(1):80–83, 2013.
30. C. Miniussi, E. L. Wilding, J. Coull, and A. C. Nobre. Orienting attention in time: Modulation of brain potentials. *Brain*, 122(8):1507–1518, 1999.
31. M. Mueller, B. A. Pardo, G. J. Mysore, and V. Valimaki. Recent advances in music signal processing [from the guest editors]. *IEEE Signal Processing Magazine*, 36(1):17–19, 2018.
32. V. Müller, J. Sängner, and U. Lindenberger. Intra-and inter-brain synchronization during musical improvisation on the guitar. *PloS one*, 8(9):e73852, 2013.
33. A. C. Nobre and F. Van Ede. Anticipated moments: temporal structure in attention. *Nature Reviews Neuroscience*, 19(1):34, 2018.
34. F. M. Nuyens, D. J. Kuss, O. Lopez-Fernandez, and M. D. Griffiths. The potential interaction between time perception and gaming: A narrative review. *International Journal of Mental Health and Addiction*, pages 1–21, 2019.
35. R. Oostenveld, P. Fries, E. Maris, and J.-M. Schoffelen. Fieldtrip: open source software for advanced analysis of meg, eeg, and invasive electrophysiological data. *Computational intelligence and neuroscience*, 2011, 2011.
36. F. Pedregosa, G. Varoquaux, A. Gramfort, V. Michel, B. Thirion, O. Grisel, M. Blondel, P. Prettenhofer, R. Weiss, V. Dubourg, J. Vanderplas, A. Passos, D. Cournapeau, M. Brucher, M. Perrot, and E. Duchesnay. Scikit-learn: Machine learning in Python. *Journal of Machine Learning Research*, 12:2825–2830, 2011.
37. A. L. Pinho, F. Ullén, M. Castelo-Branco, P. Fransson, and Ö. de Manzano. Addressing a paradox: dual strategies for creative performance in introspective and extrospective networks. *Cerebral Cortex*, 26(7):3052–3063, 2015.
38. J. Pressing. Improvisation: methods and models. *John A. Sloboda (Hg.): Generative processes in music, Oxford*, pages 129–178, 1988.

39. J. Pressing. Psychological constraints on improvisational expertise and communication. *In the course of performance: Studies in the world of musical improvisation*, pages 47–67, 1998.
40. L. R. Rabiner. A Tutorial on Hidden Markov Models and Selected Applications in Speech Recognition. *Proceedings of the IEEE*, 77:257–286, 1989.
41. M. E. Raichle. The brain’s default mode network. *Annual review of neuroscience*, 38:433–447, 2015.
42. S. Sanyal, A. Banerjee, S. Mukherjee, T. Guhathakurata, R. Sengupta, and D. Ghosh. Musical improvisation and brain correlates: an eeg based neurocognitive study using hindustani music. *J. Biomusic. Eng*, 4(119):10–4172, 2016.
43. M. Sasaki, J. Iversen, and D. E. Callan. Music improvisation is characterized by increase eeg spectral power in prefrontal and perceptual motor cortical sources and can be reliably classified from non-improvisatory performance. *Frontiers in Human Neuroscience*, 13, 2019.
44. R. Sitaram, T. Ros, L. Stoeckel, S. Haller, F. Scharnowski, J. Lewis-Peacock, N. Weiskopf, M. L. Blefari, M. Rana, E. Oblak, N. Birbaumer, and J. Sulzer. Closed-loop brain training: The science of neurofeedback. *Nature Reviews Neuroscience*, 18(2):86–100, 2017.
45. C. E. Stevens Jr and D. L. Zabelina. Creativity comes in waves: an eeg-focused exploration of the creative brain. *Current Opinion in Behavioral Sciences*, 27:154–162, 2019.
46. J. Stone, N. Hunkin, J. Porrill, R. Wood, V. Keeler, M. Beanland, M. Port, and N. Porter. When is now? perception of simultaneity. *Proceedings of the Royal Society of London. Series B: Biological Sciences*, 268(1462):31–38, 2001.
47. L. Tan and H. X. Sin. Flow research in music contexts: A systematic literature review. *Musicae Scientiae*, page 1029864919877564, 2019.
48. D. Van der Schyff, A. Schiavio, A. Walton, V. Velardo, and A. Chemero. Musical creativity and the embodied mind: Exploring the possibilities of 4e cognition and dynamical systems theory. *Music & Science*, 1:2059204318792319, 2018.
49. X. Wan, B. Crüts, and H. J. Jensen. The causal inference of cortical neural networks during music improvisations. *PloS one*, 9(12):e112776, 2014.
50. M. Wiener and R. Kanai. Frequency tuning for temporal perception and prediction. *Current Opinion in Behavioral Sciences*, 8:1–6, 2016.

51. M. Wiener, A. Parikh, A. Krakow, and H. B. Coslett. An intrinsic role of beta oscillations in memory for time estimation. *Scientific reports*, 8(1):1–17, 2018.
52. M. Wittmann. Embodied time: The experience of time, the body, and the self. 2014.
53. A. Wykowska and V. Arstila. On the flexibility of human temporal resolution. *Subjective Time: The Philosophy, Psychology, and Neuroscience of Temporality*, page 431, 2014.



## a. ECOLOGICAL PARADIGM

- Preparation: R (resting)
- Performance: Musical Improvisation
- Subjective Rating: Listening and Annotation

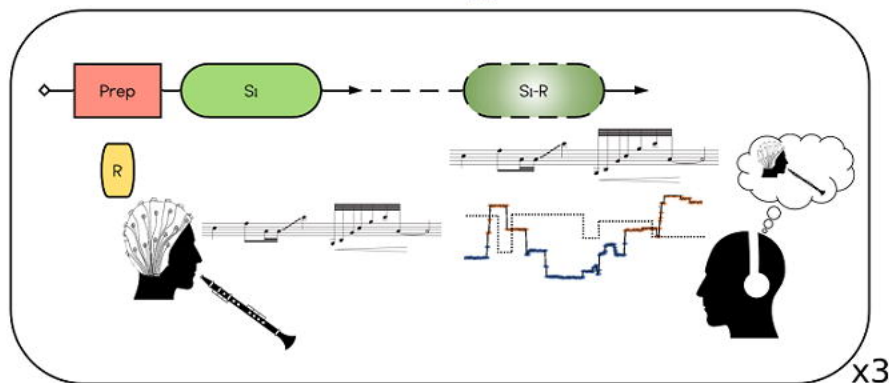

## b. CONTROLLED PARADIGM

- Preparation: R (resting), B (baseline), M (meditation)
- Performance: Musical Improvisation Imagery

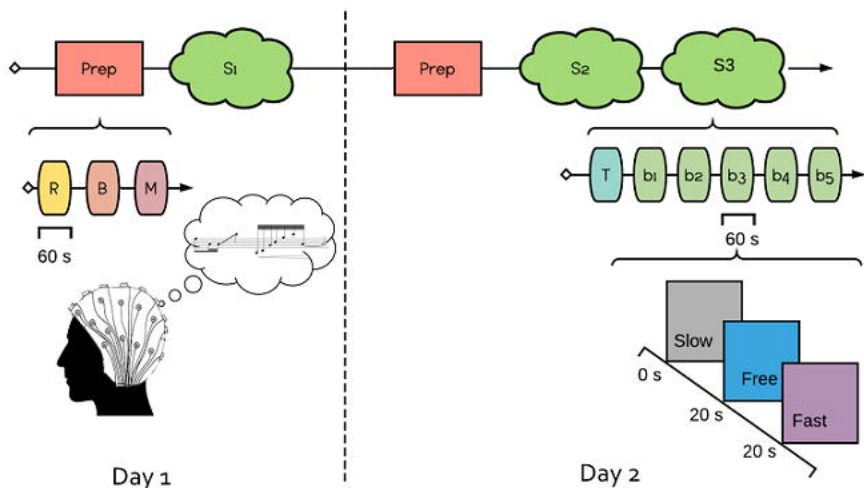

## a. Performance 1

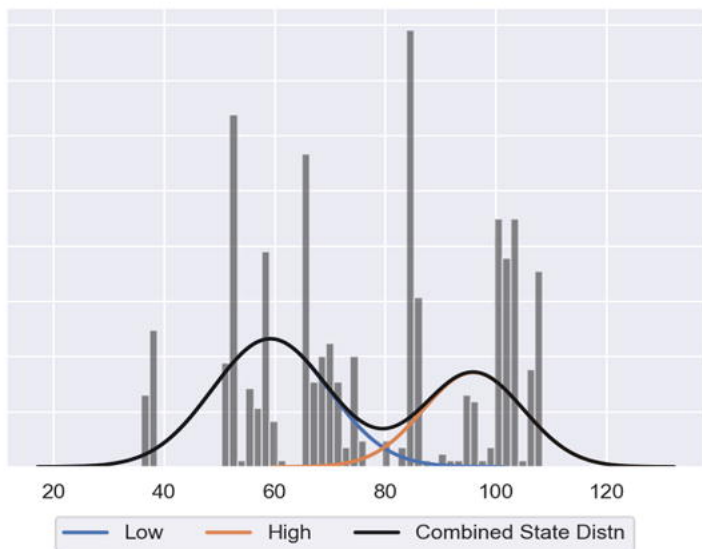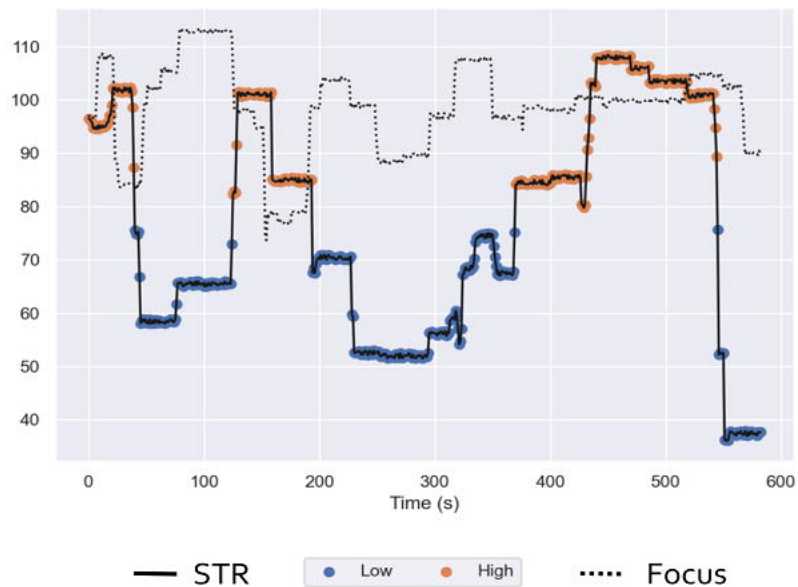

## b. Performance 3

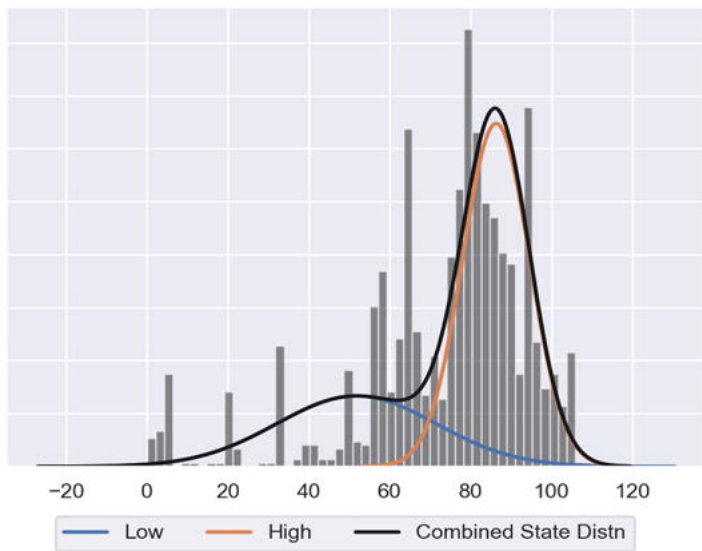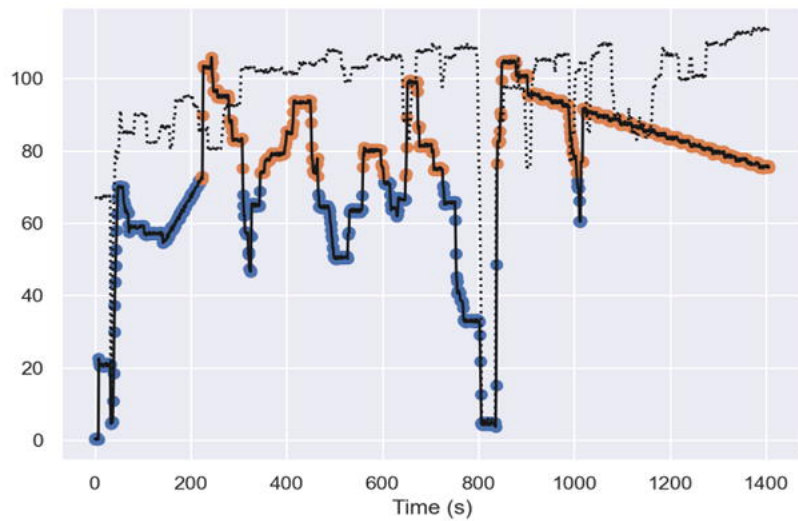

### a. Performance 1

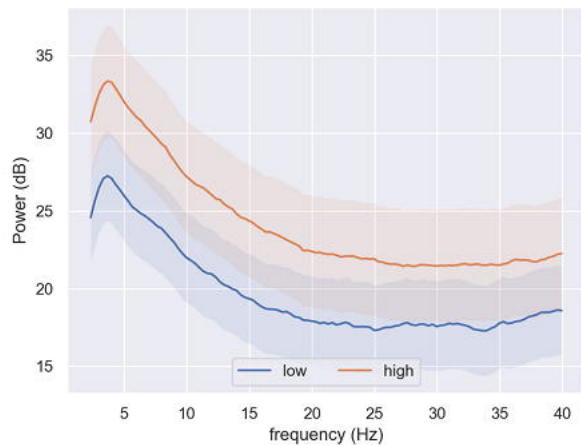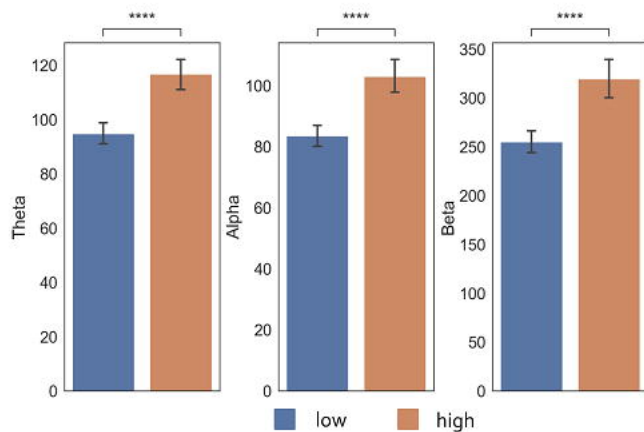

### b. Performance 3

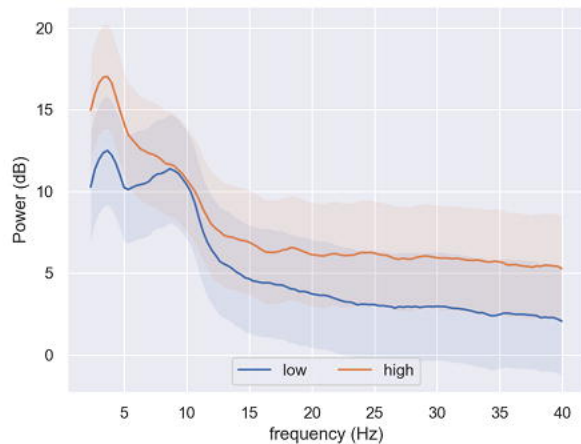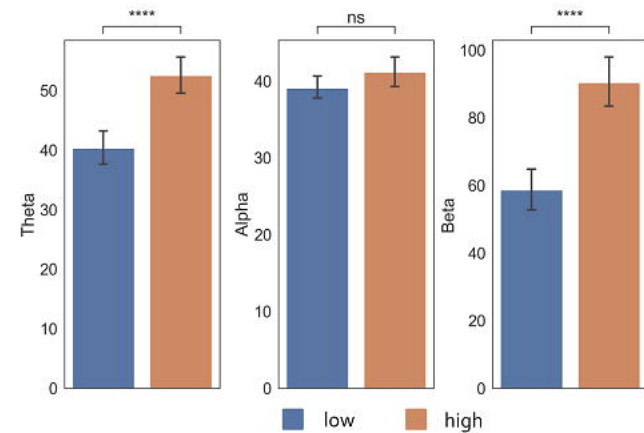

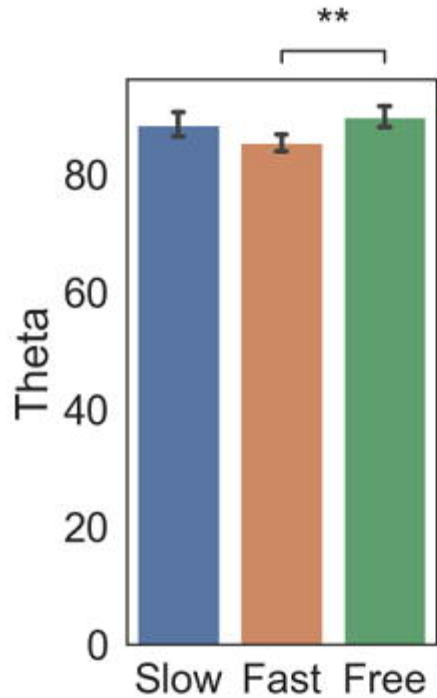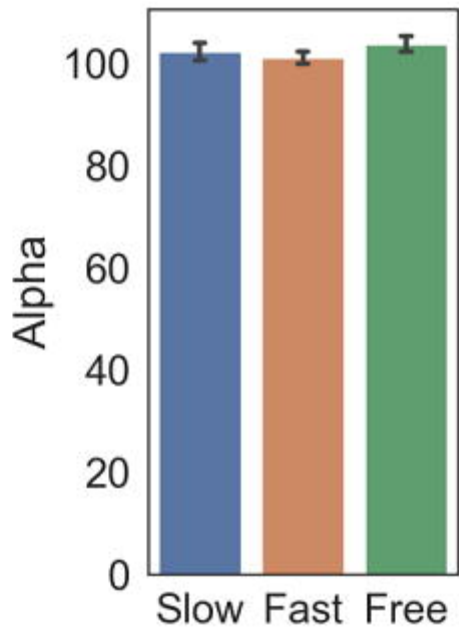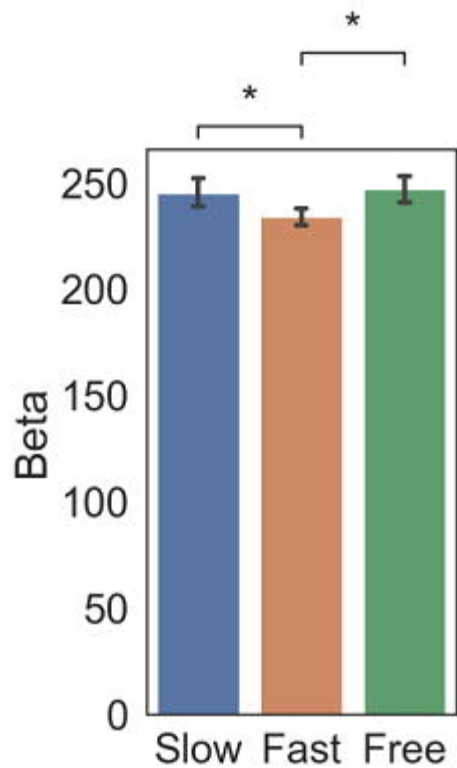

Source: https://www.biorxiv.org/content/10.1101/2020.11.08.373217v1.full.pdf
